# Supplementary material for: Prognostic significance of abnormal matrix collagen remodeling in colorectal cancer based on histologic and bioinformatics analysis
Source: PubMed Central journal article supplement — Oncol Rep. 2020 Aug 11;44(4):1671–85. doi: 10.3892/or.2020.7729 (PMC7448414; doi:10.3892/or.2020.7729), 2020-08-11
Supplement: Supplementary_Data.pdf [file Supplementary_Data.pdf]

Table SI. Antibodies used for immunohistochemical analysis.

| Antibody | Company              | Clone and dilution | Species | Catalog number | Site                                    |
|----------|----------------------|--------------------|---------|----------------|-----------------------------------------|
| COL I    | Abcam, Cambridge, UK | Polyclone; 1:800   | Rabbit  | ab34710        | Extracellular matrix                    |
| COL IV   | Abcam                | Polyclone; 1:200   | Rabbit  | ab6586         | Extracellular matrix                    |
| COL III  | Abcam                | Polyclone; 1:800   | Rabbit  | ab7778         | Extracellular matrix                    |
| MMP-1    | Abcam                | Polyclone; 1:500   | Rabbit  | ab38929        | Extracellular matrix                    |
| MMP-2    | Abcam                | 6E3F8; 1:800       | Mouse   | ab86607        | Extracellular matrix, membrane, nucleus |
| MMP-7    | Abcam                | Polyclone; 1:100   | Rabbit  | ab189277       | Extracellular matrix                    |
| MMP-9    | Abcam                | Polyclone; 1:800   | Rabbit  | ab38898        | Extracellular matrix                    |
| LOXL2    | Abcam                | Polyclone; 1:500   | Rabbit  | ab197779       | Extracellular matrix                    |
